# Supplementary material for: Sizable bandgaps of graphene in 3d transition metal intercalated defective graphene/WSe2 heterostructures
Source: Royal Society of Chemistry journal article supplement (doi:10.1039/c9ra03034d), 2019-01-01
Supplement: c9ra03034d1.pdf [file c9ra03034d1.pdf]

# Sizable Bandgaps of graphene in 3*d* Transition Metal Intercalated Defected Graphene/WSe<sub>2</sub> Heterostructures

Xiuyun Zhang,<sup>1\*</sup> Yi Sun,<sup>1</sup> Weicheng Gao,<sup>1</sup> Yin Lin,<sup>1</sup> Xinli Zhao,<sup>1</sup> Qiang Wang,<sup>1</sup> Xiaojing Yao,<sup>2\*</sup> Maoshuai He,<sup>3</sup> Xiaoshan Ye<sup>1</sup> and Yongjun Liu<sup>1\*</sup>

<sup>1</sup> College of Physics Science and Technology, Yangzhou University, Yangzhou 225002, China

<sup>2</sup> College of Physics and Information Engineering, Hebei Advanced Thin Films Laboratory, Hebei Normal University, Shijiazhuang 050024, China

<sup>3</sup> Key Laboratory of Eco-Chemical Engineering, Ministry of Education, Taishan Scholar Advantage and Characteristic Discipline Team of Eco Chemical Process and Technology, College of Chemistry and Molecular Engineering, Qingdao University of Science and Technology, Qingdao 266042, China

**Supporting Information**

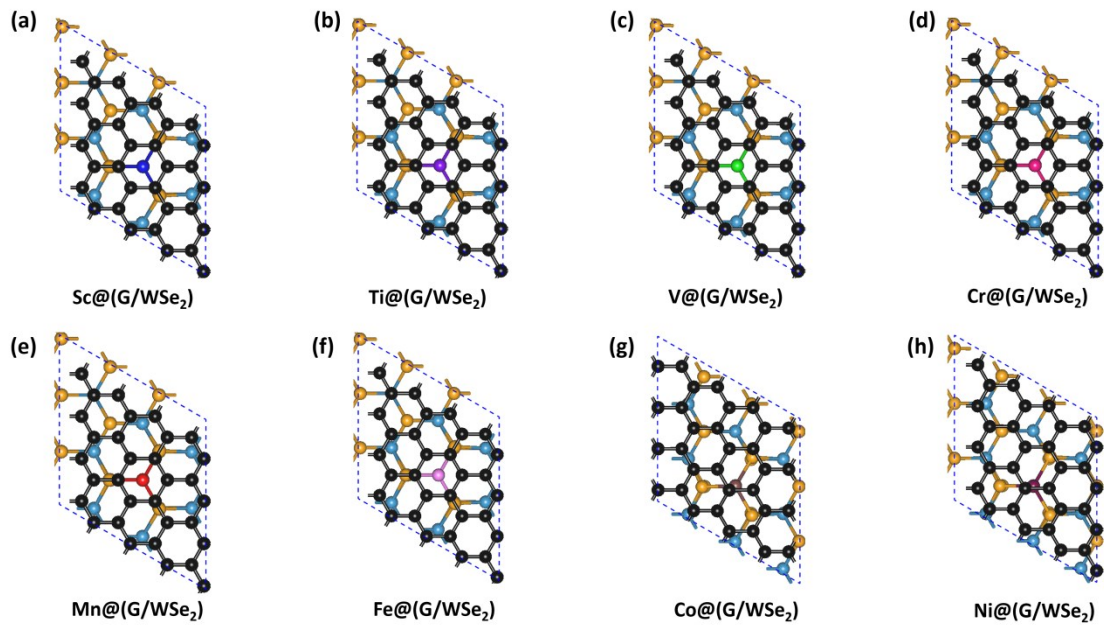

**Figure S1.** Optimized structures of  $\text{TM}@\text{(G/WSe}_2\text{)}_s$ ,  $\text{TM}=\text{Sc-Ni}$ . Black, blue and yellow balls represent the C, W and Se atoms, respectively.

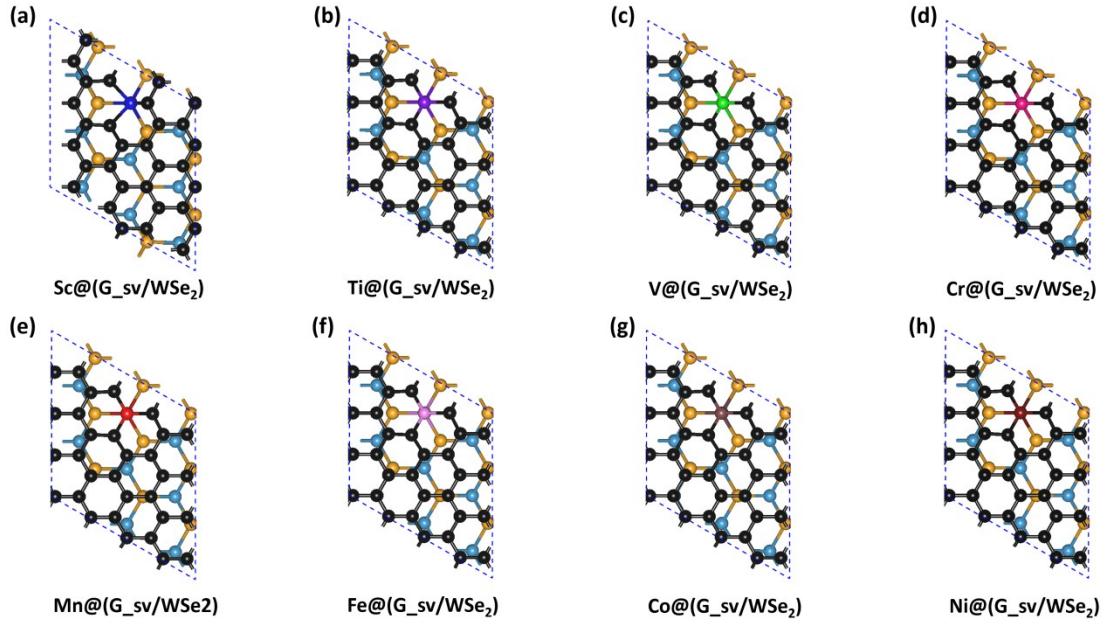

**Figure S2.** Optimized structures of  $\text{TM}@\text{(G}_{\text{sv}}\text{/WSe}_2\text{)}_s$ ,  $\text{TM}=\text{Sc-Ni}$ . Black, blue and yellow balls represent the C, W and Se atoms, respectively.

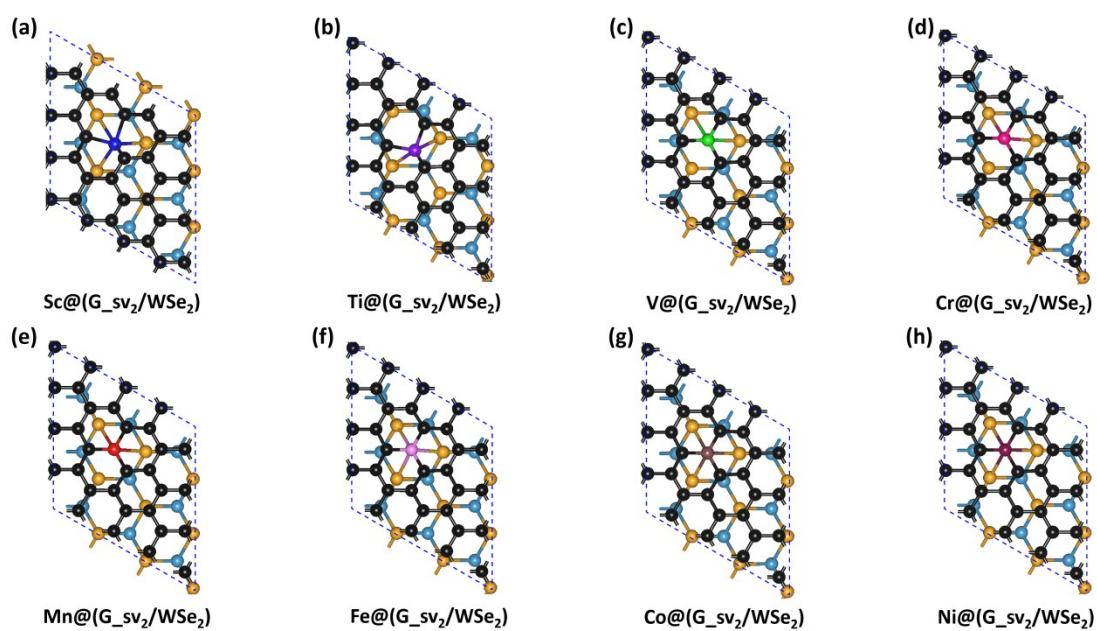

**Figure S3.** Optimized structures of TM@(G<sub>sv2</sub>/WSe<sub>2</sub>)s, TM=Sc-Ni. Black, blue and yellow balls represent the C, W and Se atoms, respectively.

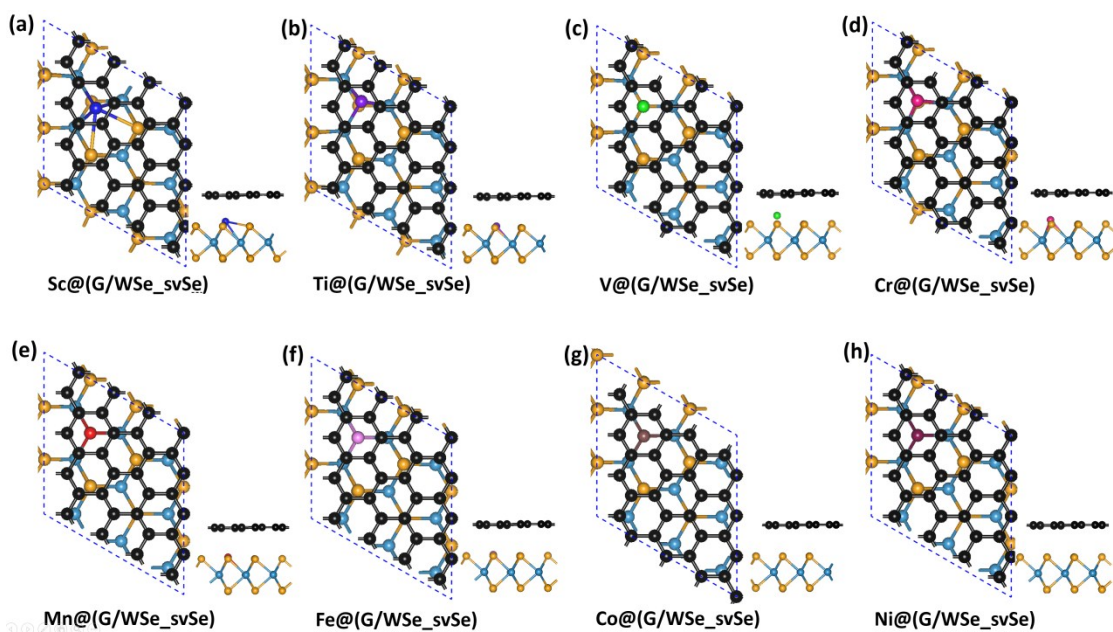

**Figure S4.** Optimized structures of TM@(G/WSe<sub>svSe</sub>)s, TM=Sc-Ni. Black, blue and yellow balls represent the C, W and Se atoms, respectively.

**Table S1.** The distance of TM atoms to the graphene layer ( $D_{\text{TM-G}}$ , Å) and WSe<sub>2</sub> layer ( $D_{\text{TM-WSe}_2}$ , Å), the total magnetic moments (MM,  $\mu_{\text{B}}$ ) the band gap ( $\Delta$ , eV) of half metals and semiconductors, the metallic properties of the TM@(G/WSe<sub>2</sub>)s systems.

| Sys                      | $D_{\text{TM-G}}$ (Å) | $D_{\text{TM-WSe}_2}$ (Å) | MM( $\mu_{\text{B}}$ ) | $\Delta$ (eV)(metallic) |
|--------------------------|-----------------------|---------------------------|------------------------|-------------------------|
| Sc@(G/WSe <sub>2</sub> ) | 1.81                  | 1.68                      | 1.80                   | 0(metal)                |
| Ti@(G/WSe <sub>2</sub> ) | 1.8                   | 1.53                      | 2.46                   | 0(metal)                |
| V@(G/WSe <sub>2</sub> )  | 1.74                  | 1.49                      | 3.81                   | 0.23(HM)                |
| Cr@(G/WSe <sub>2</sub> ) | 1.82                  | 1.53                      | 4.30                   | 0(metal)                |
| Mn@(G/WSe <sub>2</sub> ) | 1.74                  | 1.55                      | 3.05                   | 0.13(HM)                |
| Fe@(G/WSe <sub>2</sub> ) | 1.79                  | 1.44                      | 2.02                   | 0.05(HM)                |
| Co@(G/WSe <sub>2</sub> ) | 2.17                  | 1.14                      | 1.02                   | 0.06(HM)                |
| Ni@(G/WSe <sub>2</sub> ) | 2.25                  | 1.11                      | 0                      | 0.06(SC)                |

**Table S2.** The distance of TM atoms to the graphene layer ( $D_{\text{TM-G}}$ , Å) and WSe<sub>2</sub> layer ( $D_{\text{TM-WSe}_2}$ , Å), the total magnetic moments (MM,  $\mu_{\text{B}}$ ) and the band gap ( $\Delta$ , eV) of half metallic and semiconducting TM@(G<sub>sv</sub>/WSe<sub>2</sub>)s and TM@(G<sub>sv2</sub>/WSe<sub>2</sub>)s. Numbers of “1” and “2” represent the related information for TM@(G<sub>sv</sub>/WSe<sub>2</sub>)s and TM@(G<sub>sv2</sub>/WSe<sub>2</sub>)s, respectively.

| Sys                                     | $D_{\text{TM-G1,2}}$ (Å) | $D_{\text{TM-Se1,2}}$ (Å) | MM <sub>1,2</sub> ( $\mu_{\text{B}}$ ) | $\Delta_{1,2}$ (eV) |
|-----------------------------------------|--------------------------|---------------------------|----------------------------------------|---------------------|
| Sc@(G <sub>sv</sub> /WSe <sub>2</sub> ) | 1.08/1.04                | 2.80-2.81/2.79-2.89       | 0.72/0.32                              | 0.39(HM)/0(metal)   |
| Ti@(G <sub>sv</sub> /WSe <sub>2</sub> ) | 1.22/1.00                | 2.74-2.75/2.70-2.72       | 0/0                                    | 0.10(HM)/0.09(HM)   |
| V@(G <sub>sv</sub> /WSe <sub>2</sub> )  | 1.16/1.11                | 2.67-2.68/2.73-2.77       | 1.0/1.0                                | 0.13(HM)/0.29(SC)   |
| Cr@(G <sub>sv</sub> /WSe <sub>2</sub> ) | 1.11/1.08                | 2.66-2.66/2.66-2.80       | 2.0/2.0                                | 0.27(HM)/0.22(HM)   |

|                                         |           |                      |           |                   |
|-----------------------------------------|-----------|----------------------|-----------|-------------------|
| Mn@(G <sub>sv</sub> /WSe <sub>2</sub> ) | 1.08/1.05 | 2.70-2.71/2.68-2.82  | 2.93/2.98 | 0(metal)/0(metal) |
| Fe@(G <sub>sv</sub> /WSe <sub>2</sub> ) | 1.00/0.94 | 2.63-2.64/2.62-2.78  | 0/0       | 0.51(SC)/0.39(SC) |
| Co@(G <sub>sv</sub> /WSe <sub>2</sub> ) | 1.01/0.98 | 2.65-2.69/ 2.68-2.73 | 0.96/0.88 | 0.58(HM)/0.52(HM) |
| Ni@(G <sub>sv</sub> /WSe <sub>2</sub> ) | 1.05/1.04 | 2.69-2.69/2.68-2.72  | 0/0       | 0.29(SC)/0.30(SC) |

**Table S3.** The distance of graphene layer and WSe<sub>2</sub> layer ( $D_{\text{layer}}$ , Å), the total magnetic moments (MM,  $\mu_B$ ) and the metallic properties of the TM@(G/WSe<sub>sv</sub>Se)s.

| Sys                         | $D_{\text{layer}}$ (Å) | MM( $\mu_B$ ) | metallic |
|-----------------------------|------------------------|---------------|----------|
| Sc@(G/WSe <sub>sv</sub> Se) | 3.32                   | 0.69          | metal    |
| Ti@(G/WSe <sub>sv</sub> Se) | 3.3                    | 0             | metal    |
| V@(G/WSe <sub>sv</sub> Se)  | 3.29                   | 4.82          | metal    |
| Cr@(G/WSe <sub>sv</sub> Se) | 3.33                   | 0.19          | metal    |
| Mn@(G/WSe <sub>sv</sub> Se) | 3.35                   | 3.02          | metal    |
| Fe@(G/WSe <sub>sv</sub> Se) | 3.32                   | 2.30          | metal    |
| Co@(G/WSe <sub>sv</sub> Se) | 3.35                   | 1.03          | metal    |
| Ni@(G/WSe <sub>sv</sub> Se) | 3.35                   | 0             | metal    |

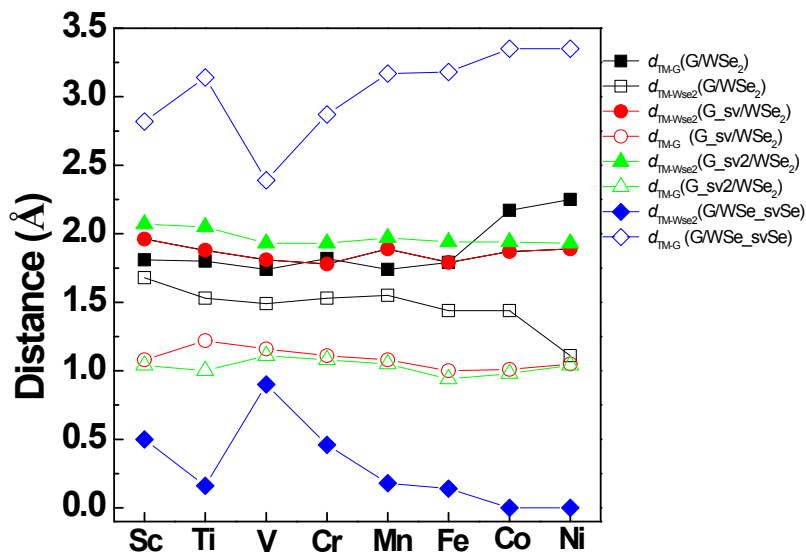

**Figure S5.** The distances of TM atoms to the graphene layer and WSe<sub>2</sub> layer in TM@(G/WSe<sub>2</sub>)s, TM@(G\_sw/WSe<sub>2</sub>)s, TM@(G\_sw<sub>2</sub>/WSe<sub>2</sub>)s and TM@(G/WSe\_swSe)s, respectively.

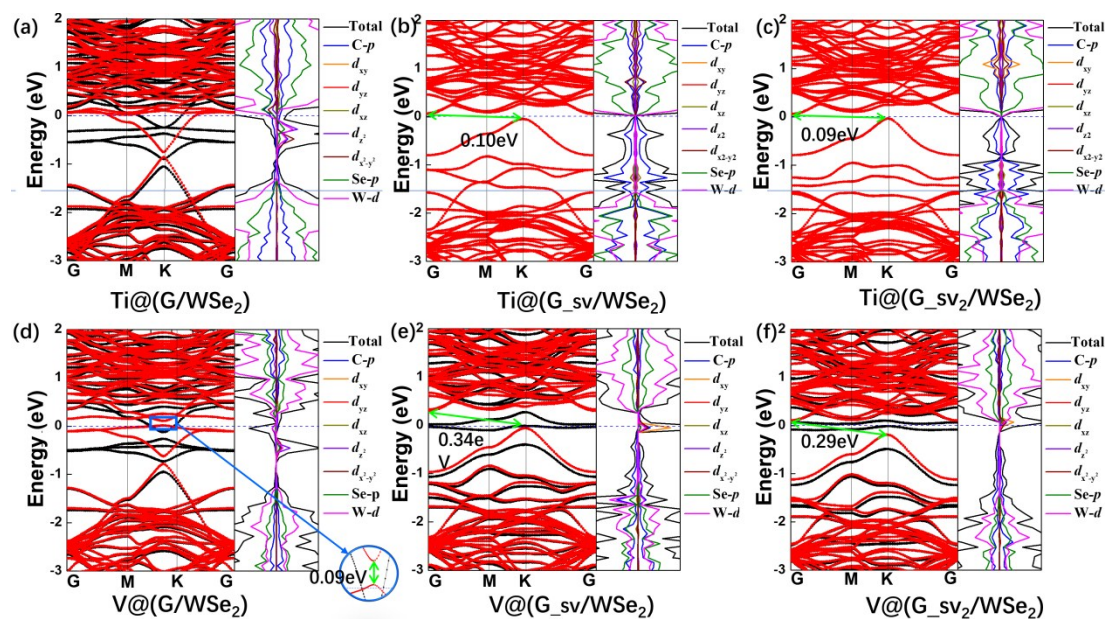

**Figure.S6.** (a-f) Plots of band structures and density of states (DOS) of TM@(G/WSe<sub>2</sub>)s, TM@(G\_sw/WSe<sub>2</sub>)s and TM@(G\_sw<sub>2</sub>/WSe<sub>2</sub>)s, TM=Ti, V, respectively.

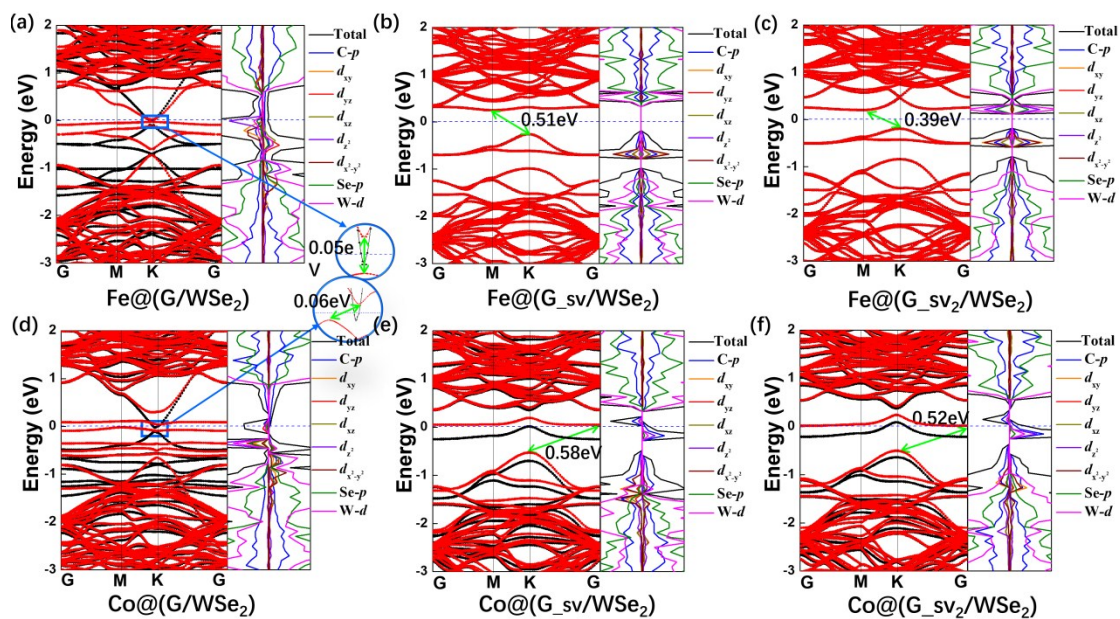

**Figure S7.** (a-f) Plots of band structures and density of states (DOS) of  $\text{TM}@\text{(G/WSe}_2\text{)}_s$ ,  $\text{TM}@\text{(G}_{sv}\text{/WSe}_2\text{)}_s$  and  $\text{TM}@\text{(G}_{sv2}\text{/WSe}_2\text{)}_s$ ,  $\text{TM}=\text{Fe, Co}$ , respectively.

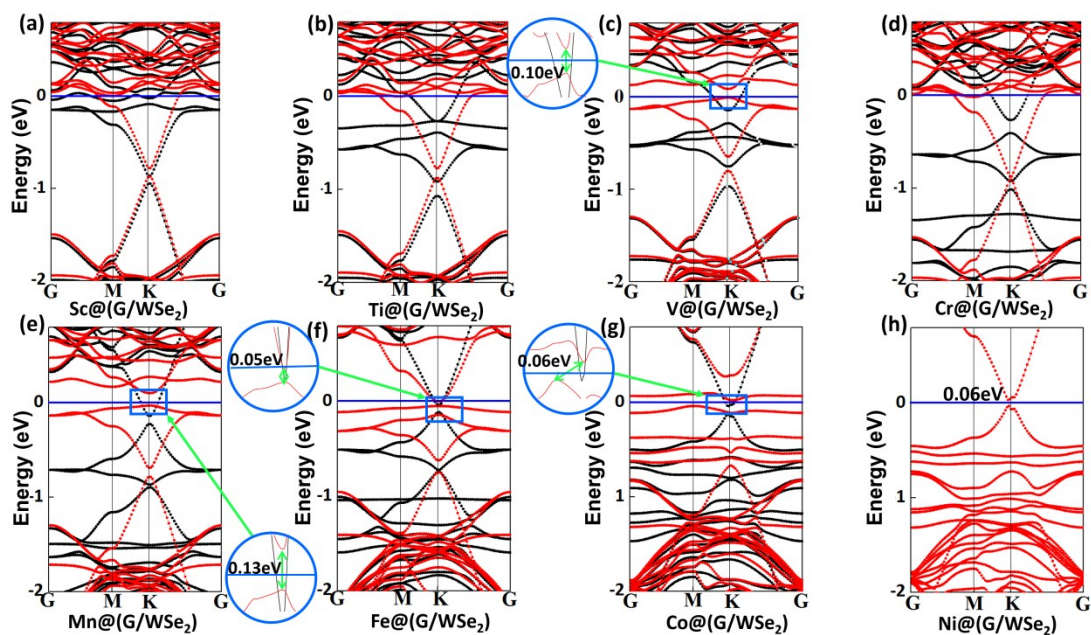

**Figure S8.** (a-h) Band structures of  $\text{TM}@\text{(G/WSe}_2\text{)}_s$ ,  $\text{TM}=\text{Sc-Ni}$ , respectively. Red and black lines represent the bands of spin up and spin down, respectively.

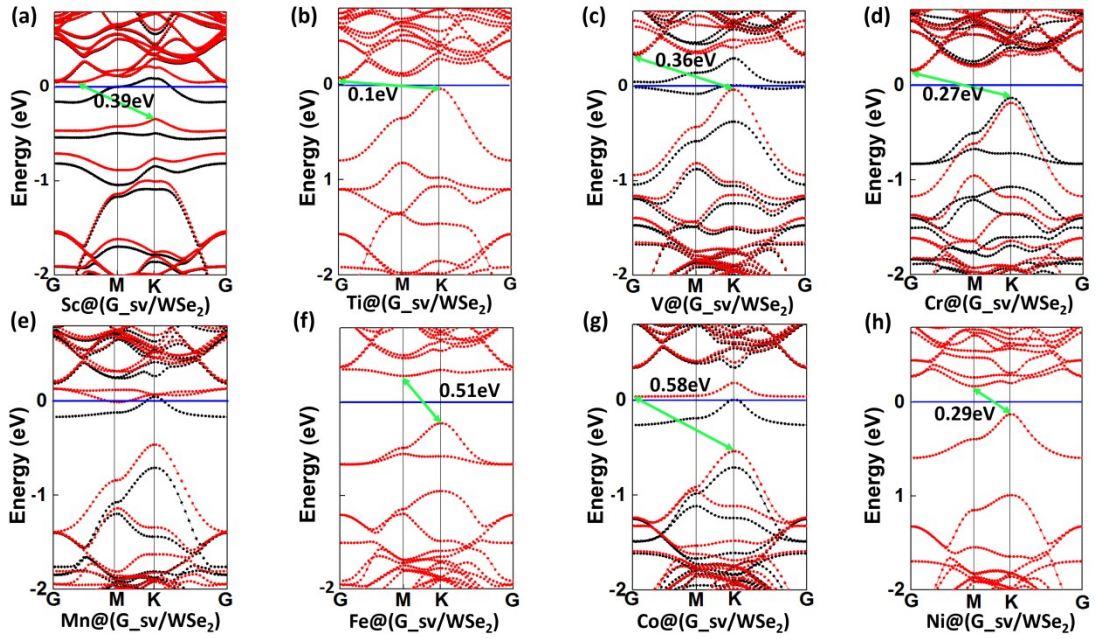

**Figure S9.** (a-h) Band structures of  $\text{TM}@\text{(G}_{sv}\text{/WSe}_2)_s$ ,  $\text{TM}=\text{Sc-Ni}$ , respectively. Red and black lines represent the bands of spin up and spin down, respectively.

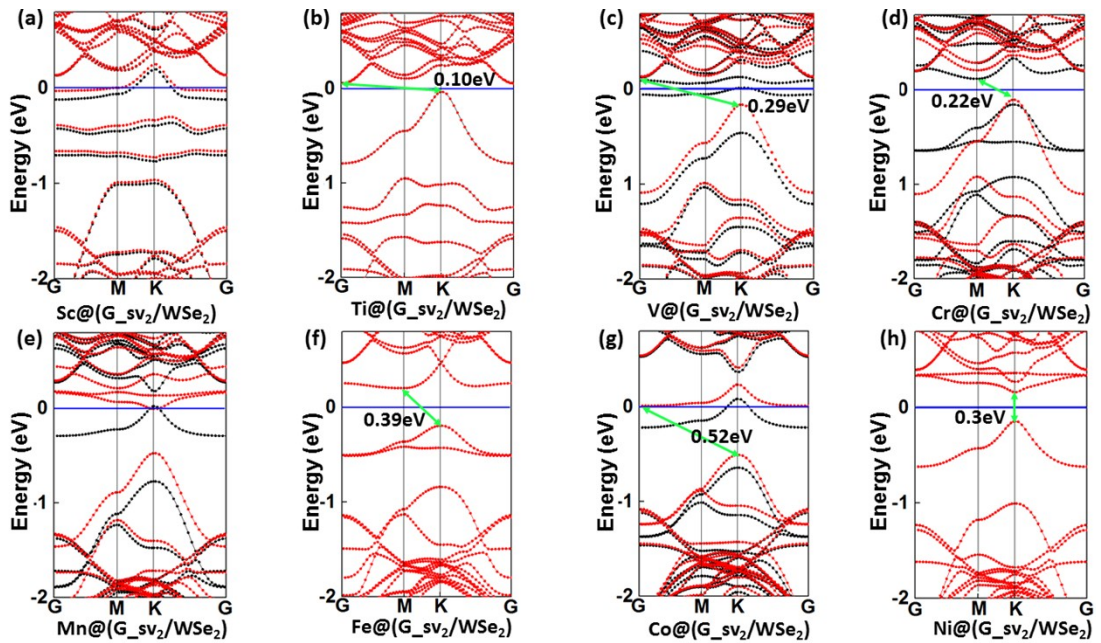

**Figure S10.** (a-h) Band structures of  $\text{TM}@\text{(G}_{sv2}\text{/WSe}_2)_s$ ,  $\text{TM}=\text{Sc-Ni}$ , respectively. Red and black lines represent the bands of spin up and spin down, respectively.



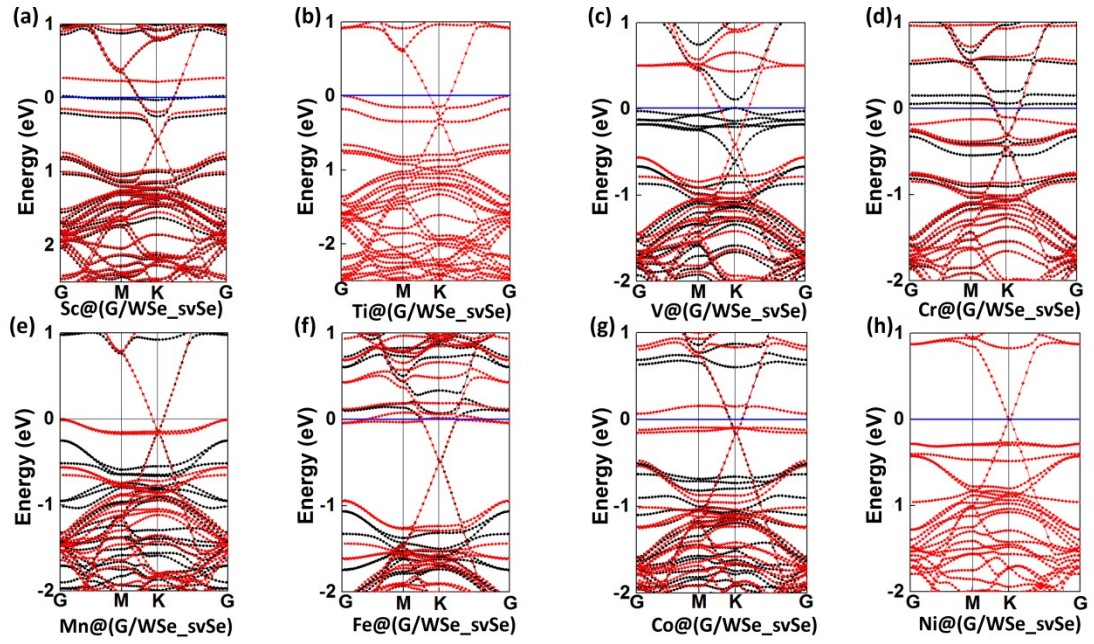

**Figure S11.** (a-h) Band structures of TM@(G/WSe<sub>2</sub>/svSe)s, TM=Sc-Ni, respectively. Red and black lines represent the bands of spin up and spin down, respectively.
